## Sensory prediction error drives subconscious motor learning outside of the laboratory

Scott Albert<sup>1</sup>, Emily Blaum<sup>2</sup>, Daniel Blustein<sup>3</sup>

<sup>1</sup>*Neuroscience Center, UNC Chapel Hill, NC, USA*

<sup>2</sup>*Neuroscience Program, Rhodes College, Memphis, TN, USA*

<sup>3</sup>*Department of Psychology, Acadia University, Wolfville, NS, Canada*

### Abstract

Sensorimotor adaptation is supported by at least two parallel learning systems: an explicit strategy which is intentionally controlled, and an involuntary implicit learning system. These two systems are generally studied in laboratory settings using visuomotor rotations, studies that have shown subconscious learning systems to be driven in part by sensory prediction error (i.e., the mismatch between the realized and expected outcome of an action). Here we used a ball rolling task to explore whether sensory prediction errors can drive implicit motor adaptation outside of the standard and highly constrained laboratory environment. After application of a visual shift, participants rapidly adapted their rolling angles to reduce the error between the ball and target. We removed all visual feedback and told participants to aim their throw directly toward the primary target, revealing an unintentional 5.19° implicit adjustment to reach angles that decayed over time. To determine whether this implicit adaptation was driven by sensory prediction error, we tested participants in a second paradigm similar to Mazzoni and Krakauer (2006) in which participants were given an aiming target that would ‘solve’ the visual shift. As expected, the aiming group showed no difference in implicit learning but developed a larger explicit strategy than the control group. Remarkably, after rapidly reducing ball rolling error to zero, rolling angles in the aiming group gradually drifted over time, resulting in an overcompensation of 3.28° beyond the target (and towards the aiming target). This involuntary drift in rolling angle, which resulted in worsening task performance, is a hallmark of implicit learning driven by sensory prediction error. These results show for the first time that implicit processes driven by sensory prediction error studied in the laboratory actively contribute to motor adaptation in naturalistic skill-based tasks with more complex body motion.

## Research summary

Current theories posit that implicit, i.e., subconscious, motor learning is driven in part by sensory prediction error (SPE): a mismatch between a movement's outcome versus the expected result<sup>1-7</sup>. The notion that errors are a critical implicit learning substrate is central to both descriptive and computational motor control models<sup>1,8-11</sup>. The visuomotor rotation (VMR) paradigm has been applied extensively to examine error-based adaptation, in which participants use a robotic manipulandum or tablet to move a cursor towards a virtual target (Fig 1, Inset). A visual rotation is applied to the cursor's path, inducing an SPE. While this constrained environment allows precise error manipulation<sup>2,6</sup>, skill learning in natural settings is more complex, involving multiple unconstrained control variables and internal models that predict the motion of external physical objects. Do SPE learning mechanisms uncovered in laboratory settings extend to these more complicated skill-based behaviors?

In the rare cases where sensorimotor adaptation has been studied in skill-based settings<sup>12-14</sup>, concrete assays to separate the implicit and explicit components<sup>2,6,15,16</sup> of memory have not been used, nor have distinct implicit learning mechanisms been delineated (e.g., SPE learning versus model-free reinforcement learning<sup>17</sup>). One skill-based task attempted to reduce explicit adaptation by providing a separate aiming strategy which may even produce the opposite effect, i.e. priming explicit adjustments<sup>14</sup>. Here we aimed to fill this gap using a task designed to detect SPE learning within motor actions of ecological relevance. To this end, we trained participants to roll a tennis ball ( $D = 0.425^\circ$  at target displacement) towards a small target ( $D=0.85^\circ$ ) 6.1m away; the ball arrived at the target about 750ms after release (Fig. 1). This paradigm introduced unconstrained control variables: variations in wrist, elbow, and shoulder angle, bend at the knees and hip, release timing, grip, and arm speed. Further, to internalize sensory error, the brain needed to map visual error between the ball and target onto the participant's temporally separated motion (conditions known to attenuate implicit learning<sup>9,18,19</sup>).

Despite these complex elements, participants achieved excellent performance, hitting the target with high precision (Fig. 2AB, first 40 trials;  $0.12^\circ$  average error [mean across all 27 participants of median error on trials 31-40]). Next, we rotated the participant's visual scene with prism glasses. The glasses, which occluded the view of the body and throwing arm, caused participants to perceive the target offset by  $30^\circ$  in space from its true position. Past the target, balls disappeared underneath a black curtain, which along with black flooring, reduced spatial reference cues. In response, participants committed throwing errors (Fig. 2A, blue rotation period) which induced rapid adaptation; participants adjusted their movement angle to mitigate the discrepancy between ball and target, reaching asymptotic performance<sup>20</sup> by approximately their 9<sup>th</sup> trial with  $-1.51^\circ$  error persisting over the last 10 trials of the period (Fig. 2A).

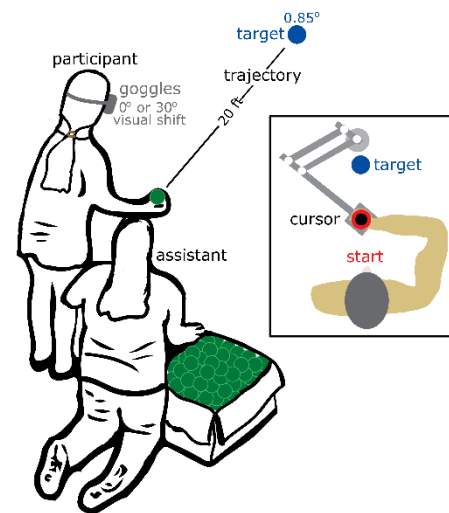

**Figure 1. Unconstrained motor task setup.** Participants wearing goggles with or without a visual shift rolled a tennis ball to a small target 20 feet away on sequential trials. **Inset.** Traditional VMR experiment (adapted from <sup>28</sup>).

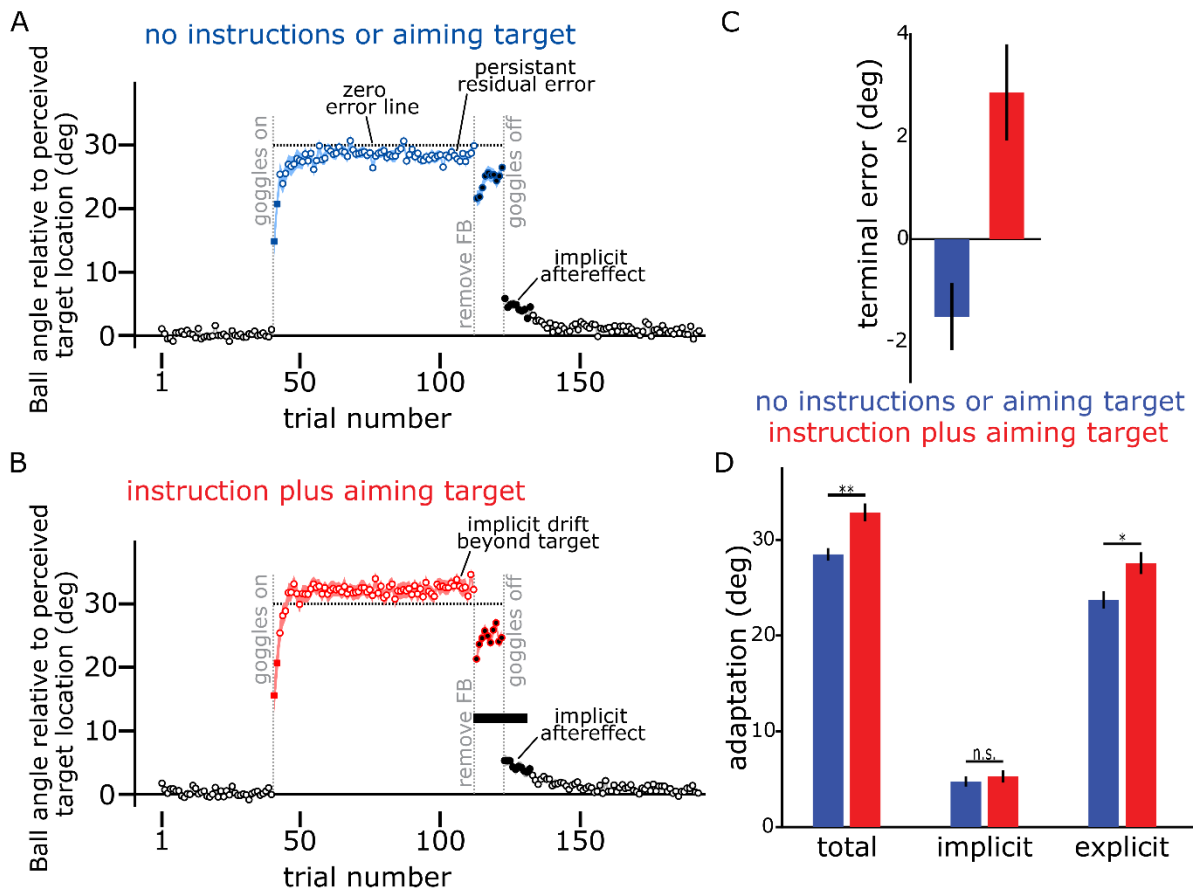

**Figure 2.** *Implicit and explicit components of unconstrained movements.* **A.** Trial-by-trial lateral error during ball rolling relative to the perceived target with no strategic instructions or aiming target provided ( $n = 27$ ). Black-outlined datapoints represent trials with no visual shift applied. Blue-outlined points represent trials with a  $30^\circ$  visual shift applied. After the first two visually shifted trials (blue squares), participants were reminded of the goal to hit the target. Black-filled datapoints indicate the absence of visual endpoint error feedback. **B.** Trial-by-trial error for participants given an aiming target to minimize error ( $n = 27$ ). Red-outlined datapoints indicate trials with a  $30^\circ$  visual shift applied. After the first two visually shifted trials (red squares), the aiming target was added and described. **C.** Median residual error on the last three trials of the visual shift block drifted beyond the target for the strategy group (red bar). **D.** Statistically significant differences between instruction and no instruction groups in total adaptation and explicit adaptation. Error bars represent standard error and asterisks indicate results of a multivariate multiple regression [ $* = p < 0.05$ ,  $** = p < 0.01$ ]

Was this rapid motor adaptation solely dependent on explicit changes in throwing strategies, e.g., intended aiming angle, or was some adaptation due to subconscious implicit learning? To measure implicit and explicit learning components, we instructed participants to continue making throws over 20 trials, but without error feedback. On these trials, participants could view the initial target location, but the room was darkened once the ball left the hand. For the initial 10 no-feedback trials, the rotation was maintained. Then, participants switched to the unshifted glasses for an additional 10 no-feedback trials. For these trials, participants were told that the glasses had been switched, and that they should aim towards the initial target location. We gave these instructions to match the conditions used to measure implicit learning via aftereffect trials in modern VMR experiments<sup>1,9,21</sup>. Throwing angles decreased from  $28.49^\circ$  (relative to perceived target location) at

the end of the adaptation period, to approximately  $5.19^\circ$  on the initial 3 unshifted no-feedback trials (Fig. 2A, implicit aftereffect). This immediate voluntary change in angle implied that participants had explicitly aimed about  $23^\circ$  away from the perceived visual target (explicit strategy was estimated by subtracting implicit learning from total adaptation during the shifted vision block). An additional  $5^\circ$  of subconscious implicit learning decayed both in the absence of error (one sample Bonferroni-corrected t-test comparing slope of error over these trials,  $t(26) = -1.54$ ,  $p = 0.0097$ ) and over the ensuing washout period ( $t(27) = -2.74$ ,  $p < 0.0001$ ).

In sum, motor behavior in our task showed a clear correspondence to lab-based VMR studies: (1) Participants adapted to the rotation, achieving steady-state performance that never completely counteracted the rotation<sup>8,9,22</sup>. (2) Learning was supported by two parallel systems<sup>2,6,15,16</sup>: an explicit strategy that participants could willfully disengage, and an implicit correction that persisted despite the participant's conscious intentions. But which error sources had engaged the implicit learning system? Implicit learning could have been caused by SPEs (error between predicted and realized motion), task errors (error between ball and target)<sup>1,8,11,23</sup>, or a model-free reinforcement of successful motor actions<sup>17</sup>. To determine whether SPEs contributed to adaptation we tested a second group with a paradigm similar to Mazzoni and Krakauer (2006) (Fig. 2B). Here, after performing two ball rolls with rotated vision, participants were told they could aim towards an assistive target in order to move the ball to the desired goal target. Participants adopted this strategy quickly, reaching steady-state performance in about 7 trials (see Methods<sup>20</sup>). Remarkably however, despite rapidly achieving zero error (i.e., hitting the target's center), the ball angle gradually drifted over time, overcompensating for the imposed rotation. By the last 3 trials of the period, the ball's path deviated by  $3.28^\circ$  beyond the task-related target (Fig. 2C), exceeding on average the target's extent (radius =  $0.425^\circ$ ,  $t(26) = 3.30$ ,  $p = 0.0028$ , 95% CI lower bound =  $1.23^\circ$ ). We confirmed a statistically significant main effect of the added instructions on this total adaptation with a multiple linear regression ( $F(2,51) = 7.688$ ,  $p = 0.0012$  for total adaptation response variable;  $\beta_{\text{Strategy}} = 4.42$ ,  $t(24) = 3.85$ ,  $p = 0.00033$ ). This involuntary drift in reach angle is a distinct hallmark of implicit learning driven by SPEs. As in Mazzoni and Krakauer, we observed no statistically significant difference in implicit learning between both groups ( $2.43^\circ$  (no aiming target),  $3.02^\circ$  (aiming target) ( $F(2,51) = 0.6438$ ,  $p = 0.53$  for implicit adaptation response variable). Since explicit adaptation is computed directly from total and implicit adaptation, it was not included in the regression analysis as a correlated variable. Nevertheless, since implicit adaptation does not explain the difference in total adaptation, the increase is due to a change in explicit strategy use (no aiming target:  $26.34^\circ$ ; aiming target:  $30.01^\circ$ ) (Fig. 2D).

These experiments demonstrate that SPEs, a theoretical construct discovered in the laboratory, also lead to subconscious sensorimotor adaptation in skill-based tasks involving object manipulation. Intriguingly, when no secondary aiming target was given, no implicit drift beyond the task-related target occurred despite clear evidence that participants still strategically aimed their movement away from the primary target (total adaptation was nearly  $30^\circ$ , but the implicit aftereffect only reached  $5^\circ$ ). This strongly indicates that SPEs need to be reinforced by a visual target error in order to drive appreciable implicit learning; this pattern also matches that observed in constrained laboratory settings (Fig. 3)<sup>2,6</sup>.

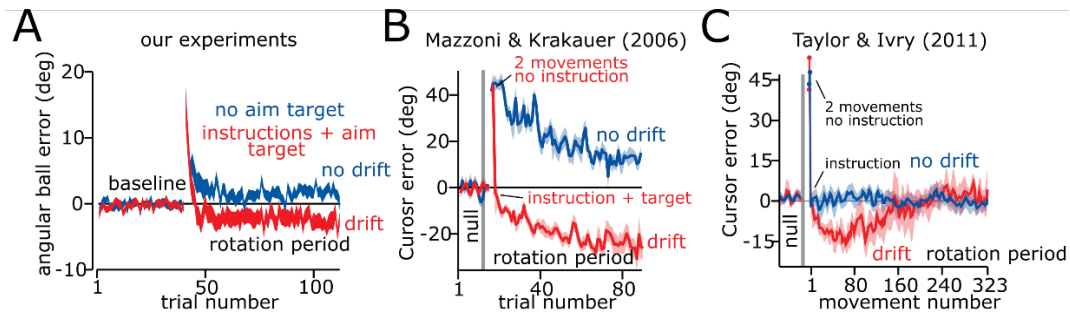

**Figure 3.** *Implicit drift occurs in several experimental contexts.* **A.** Trial-by-trial error data from Figure 2AB with actual target error appearing on the y-axis. Providing an aiming target (red) caused the angular ball error to drift beyond the target (i.e. past zero), thus overcompensating for the visual rotation. **B.** Results from Mazzoni and Krakauer (2006), an analogous lab-based experiment, which have been widely cited as evidence for SPE learning. Participants were either given no instruction (blue) or were instructed to use an aiming target to “solve” the rotation and reduce error (red). **C.** Results from Taylor & Ivry (2011), a modified version of the experiment from B. Participants were either given an aiming target (red) or taught how to re-aim their movement to counter the rotation without an additional target (blue). Even with an explicit strategy, there is no drift beyond the target in the absence of an aiming target (blue).

Visual target errors between the aiming location and ball also appeared to modulate long term motor learning; after participants completed the initial learning period, they were tested in the alternate experimental condition (Fig. 4), yielding order effects that likely depended on explicit strategy. First, we observed that drift past the task-related target tended to be greater when aiming targets were provided during the second learning period ( $3.97^\circ$ , Fig. 4D) than the first learning period ( $1.86^\circ$ , Fig. 4B) (not a statistically significant difference determined by an independent t-test:  $t(27) = -1.069$ ,  $p = 0.29$ ). This increased drift was likely due to an increase in explicit strategy<sup>24,25</sup>, which was saved upon reexposure to the same perturbation: the mean error on the first two shifted vision trials was significantly different on Block 1 ( $-19.36^\circ$ , Fig. 4AB) compared to Block 2 ( $-4.71^\circ$ , Fig. 4CD) as confirmed with a paired t-test ( $t(26)=-18.37$ ,  $p<0.0001$ ). A hybrid result was observed during the second adaptation period when no aiming target was provided (Fig. 4C). Savings in explicit strategy caused rapid elimination of residual error. Without an aiming target, reduced residual error was observed after learning had stabilized, suggesting increased explicit adaptation (compared to Fig 4A). We suspect that participants failed to mitigate overcompensation in the aiming target condition (Fig. 4D) because participant strategies were anchored to the visual aiming landmark. With extended exposure to visual shifts, implicit drift might be counteracted by changes in explicit strategy, as observed in Taylor and Ivry (2011). These ideas remain to be tested.

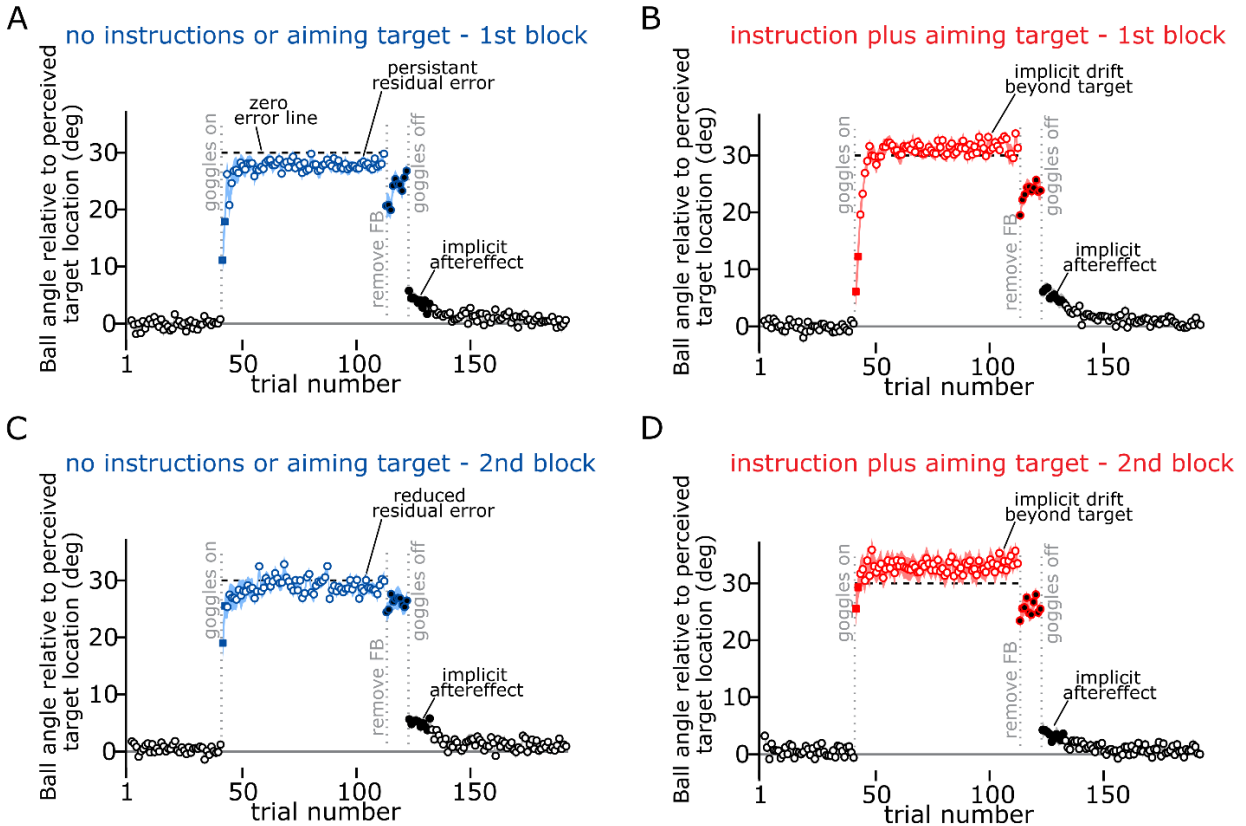

**Figure 4.** Trial-by-trial error across all block order and strategy condition pairs. **A.** Data plotted for participants completing their first block without an aiming target ( $n = 13$ ). Plotting conventions as described in Figure 2. **B.** Data from Block 1 of participants using an aiming target ( $n = 14$ ). **C.** Data from Block 2 of participants without an aiming target who first used an aiming target, the same participants as in panel B ( $n = 14$ ). **D.** Data from Block 2 participants with an aiming target who first had no aiming target, the same participants as in panel A ( $n = 13$ ).

In sum, whereas error-based learning mechanisms have been studied extensively in controlled laboratory conditions, little is known about whether this vast body of work applies to ecological skill-based behaviors. Admittedly, using prism glasses to shift the visual world is not naturalistic. Our findings simply represent a step towards more rigorous study of implicit and explicit learning processes “in the wild”. Additional work is needed to interrogate perturbations that humans encounter as they execute common motor skills. Further, motion capture must be applied to more deeply investigate whether markers of implicit and explicit adaptation can be differentiated across distinct movement components (e.g., trunk orientation and release timing may reflect explicit strategy, whereas wrist and elbow joint angles may be controlled by an implicit process). Nevertheless, our work provides the first clear and direct evidence that (1) subconscious error-driven learning processes make substantial contributions to skill-based adaptation, and (2) that this learning is in part mediated by SPEs not only in our body’s motion, but the motion of external objects that we impart through complex motor actions.

## Methods

**Ethics statement.** Human participant research was completed with the approval and oversight of the Rhodes College Institutional Review Board.

**Subject recruitment.** Thirty study participants were recruited by word of mouth, and each given a \$10 gift card for their participation (mean age = 20yrs; age range – 18 – 21; 21 female; 29 right handed but all completed ball throws with right). Data from three participants were omitted because of technical issues that resulted in missing video files that contained motor error data. Written informed consent was obtained from each participant before completing the experiment.

**Experimental setup.** Participants stood behind a line marked on the floor facing a small target ( $D=0.85^\circ$ ) on the ground 6.1m away. They were informed about the task parameters: to use an underhand motion to roll a tennis ball so that it moved through the target. The experiment took place in a black box theater with black flooring and a black curtain behind the target under which balls rolled out of view. Participants started by wearing goggles with clear lenses that allowed for unperturbed vision (Fork in the Road Vision Rehabilitation Services LLC, Madison, WI). During shifted vision blocks, participants wore Perception (Distortion) goggles (WinginItProducts, Pleasant Prairie, WI) that caused the participants to perceive visual targets offset in space by  $30^\circ$  from their true position. Both types of goggles occluded the view of the body and throwing arm and participants were asked to release the tennis ball below their waist level so the hand was never visible.

An infrared video camera (Prime Color, Optitrack) was mounted directly above the target (~7 meters above attached to a theater lighting grid). The camera was pointed at the target, capturing several meters of linear space on both sides of the target. It recorded the tennis ball rolling along the floor so that rolling error could be computed (see Data analysis). The camera was attached to a computer which displayed and recorded the video in Motive software (Optitrack). A single eStrobe (Optitrack) mounted above the target (next to the camera) provided the only illumination in the room and could be toggled on and off with a single button press in the Motive software.

A researcher kneeled next to the participant and handed tennis balls to the participant for each subsequent roll. Another researcher stood behind the curtain and collected tennis balls to make sure they did not roll back onto the visible floor space. A third researcher monitored the video recording and controlled the lights during no feedback trials. For some participants, only two researchers were present and the tennis ball wrangling and computer monitoring were done by the same individual.

**Data collection.** Each participant completed two blocks of 192 tennis ball rolls. In the ‘No Instructions’ block, participants were not given a strategy to counteract the visual perturbation. In the ‘Aiming Target’ block, participants were given a secondary target to use that would minimize the error resulting from the visual perturbation. The order of the blocks was randomly assigned to the participants (after the three excluded participants, 13 participants completed ‘No Instructions’ first and 14 participants completed ‘Aiming Target’ first).

Participants first completed 40 baseline movement trials, rolling the ball to the target without shifted vision. Then participants switched to goggles that shifted their vision by  $30^\circ$ . To switch the

goggles, participants first closed their eyes. The researcher then assisted with doffing the current goggles and donning the new goggles. With eyes still closed, participants were then guided through a series of in-place rotations in order to reset the relative orientation between the target and the body. Then participants opened their eyes.

In the ‘No Instructions’ block, participants then completed two trials with shifted vision after which the researcher said: *“Try to hit the target.”*. Participants then completed another 70 trials with the shifted visual feedback.

In the ‘Aiming Target’ block, participants completed two trials with shifted vision after which the researcher placed an aiming target, matching the size and appearance of the original target. Balls rolled directly at the aiming target would hit the original target. The researcher explained this to the participant: *“You just made two large errors because we imposed a rotation that pushes you 30 degrees to the left. You can reduce this error by aiming at the new target to your right.”*

After 72 total trials with the shifted goggles, participants then completed 10 trials with the same visual shift but with no endpoint error feedback. Participants were made aware before these trials that the light would turn off immediately after they released the ball. The researcher controlling the computer manually shut off the eStrobe light as soon as the tennis ball first hit the floor at the start of the participant’s roll, making the room completely dark. Since the camera was imaging in the infrared spectrum, the tennis ball could still be viewed from the computer. As soon as the tennis ball passed the target and went out of view underneath the curtain, the researcher turned on the light.

After 10 trials with no endpoint visual feedback, the goggles were switched back to the clear lens goggles and participants were told: *“I would like you to aim for the original target again.”* Participants completed 10 additional trials without endpoint visual feedback with no vision shift. Then participants completed 60 trials with no visual shift with endpoint visual feedback (i.e. the lights stayed on).

### **Data analysis.**

Video recordings were analyzed using Vernier Video Analysis software (Vernier Science Education, Beaverton, OR). Small pieces of tape on the ground set at 1m apart and visible in the video frame but not visible to participants were used to calibrate position measurements in the software. When the tennis ball was in line with the target, its position was marked manually with a mouse click in the software for each trial. The lateral error between the target and tennis ball was computed for the entire set of trials using the marked reference positions on the video frames.

Data were loaded into MATLAB software and a custom script was used to calculate descriptive statistics and identify the steady-state trials during the visual rotation block after which learning had stabilized<sup>20</sup>. Total Adaptation was calculated as the sum of the visual shift (30°) and the median error over the last three trials of the shifted vision with feedback trials [i.e. how much movements were adapted under the visual shift]. Implicit adaptation was calculated as the median error over the first three trials immediately after switching to unshifted vision (after the shifted vision block). Explicit adaptation was computed as the difference between Total Adaptation and Implicit



Adaptation. Graphical plots were generated in R and MATLAB supported by publicly available scripts<sup>26,27</sup>.

A multiple linear regression was run in RStudio (v2022.07.1, R version 4.1.1) with Total Adaptation and Implicit Adaptation as the outcome variables and Block Number and Strategy Condition (i.e. with or without aiming target) as the predictor variables. Explicit Adaptation was not included in the regression since it is computed from the included outcome variables and thus correlated with them. Secondary inferential statistical analyses were conducted to further explain the results. Bonferroni-corrected p-values from t-tests were used to describe pairwise comparisons that appear in Fig 2CD. The same analysis was run on pairwise comparisons with data separated into the four different blocks (Fig 4). The median tennis ball error during the last three trials of the rotated vision trials with feedback was analyzed using a one sample t-test to determine if the ball's error was beyond the physical extent of the target (i.e. including the radius of the target and ball). To investigate savings (and by extension, the influence of an explicit strategy), a paired t-test was run comparing initial error on the first two visual shift trials between Block 1 and Block 2.

### Data and code.

All data, analysis code and plotting scripts are available here: [https://osf.io/8kf59/?view\\_only=cfeb2f109d304994bbd3a5f5a44c11ae](https://osf.io/8kf59/?view_only=cfeb2f109d304994bbd3a5f5a44c11ae)

### Acknowledgments

We thank Parker Hill and Erin Kuylenstierna for assistance with data collection. We thank Dr. Shubho Banerjee for assistance with the experimental setup.

### References

1. Tsay, J. S., Haith, A. M., Ivry, R. B. & Kim, H. E. Interactions between sensory prediction error and task error during implicit motor learning. *PLoS Comput Biol* **18**, e1010005 (2022).
2. Mazzoni, P. & Krakauer, J. W. An Implicit Plan Overrides an Explicit Strategy during Visuomotor Adaptation. *J Neurosci* **26**, 3642–3645 (2006).
3. Wong, A. L. & Shelhamer, M. Using prediction errors to drive saccade adaptation: the implicit double-step task. *Exp Brain Res* **222**, 55–64 (2012).
4. Tseng, Y., Diedrichsen, J., Krakauer, J. W., Shadmehr, R. & Bastian, A. J. Sensory Prediction Errors Drive Cerebellum-Dependent Adaptation of Reaching. *J Neurophysiol* **98**, 54–62 (2007).
5. Shadmehr, R., Smith, M. A. & Krakauer, J. W. Error Correction, Sensory Prediction, and Adaptation in Motor Control. *Annu Rev Neurosci* **33**, 89–108 (2010).
6. Taylor, J. A. & Ivry, R. B. Flexible Cognitive Strategies during Motor Learning. *PLoS Comput Biol* **7**, e1001096 (2011).
7. Morehead, J. R. & Xivry, J.-J. O. de. A Synthesis of the Many Errors and Learning Processes of Visuomotor Adaptation. *bioRxiv* doi: 10.1101/2021.03.14.435278 (2021).

8. Albert, S. T. *et al.* Competition between parallel sensorimotor learning systems. *eLife* **11**, e65361 (2022).
9. Albert, S. T. *et al.* An implicit memory of errors limits human sensorimotor adaptation. *Nat Hum Behav* **5**, 920–934 (2021).
10. Herzfeld, D. J., Vaswani, P. A., Marko, M. K. & Shadmehr, R. A memory of errors in sensorimotor learning. *Science* **345**, 1349–1353 (2014).
11. Miyamoto, Y. R., Wang, S. & Smith, M. A. Implicit adaptation compensates for erratic explicit strategy in human motor learning. *Nat Neurosci* **23**, 443–455 (2020).
12. van der Kamp, J., Steenbergen, B. & Masters, R. S. W. Explicit and implicit motor learning in children with unilateral cerebral palsy. *Disabil Rehabil* **40**, 2790–2797 (2018).
13. Martin, T. A., Keating, J. G., Goodkin, H. P., Bastian, A. J. & Thach, W. T. Throwing while looking through prisms: I. Focal olivocerebellar lesions impair adaptation. *Brain* **119**, 1183–1198 (1996).
14. Leukel, C., Gollhofer, A. & Taube, W. In Experts, underlying processes that drive visuomotor adaptation are different than in Novices. *Front Hum Neurosci* **9**, (2015).
15. Taylor, J. A., Krakauer, J. W. & Ivry, R. B. Explicit and Implicit Contributions to Learning in a Sensorimotor Adaptation Task. *J. Neurosci.* **34**, 3023–3032 (2014).
16. McDougle, S. D., Bond, K. M. & Taylor, J. A. Explicit and Implicit Processes Constitute the Fast and Slow Processes of Sensorimotor Learning. *J Neurosci* **35**, 9568–9579 (2015).
17. Huang, V. S., Haith, A., Mazzoni, P. & Krakauer, J. W. Rethinking Motor Learning and Savings in Adaptation Paradigms: Model-Free Memory for Successful Actions Combines with Internal Models. *Neuron* **70**, 787–801 (2011).
18. Brudner, S. N., Kethidi, N., Graeupner, D., Ivry, R. B. & Taylor, J. A. Delayed feedback during sensorimotor learning selectively disrupts adaptation but not strategy use. *J Neurophysiol* **115**, 1499–1511 (2016).
19. Schween, R. & Hegele, M. Feedback delay attenuates implicit but facilitates explicit adjustments to a visuomotor rotation. *Neurobiol Learn Mem* **140**, 124–133 (2017).
20. Blustein, D., Shehata, A., Englehart, K. & Sensinger, J. Conventional analysis of trial-by-trial adaptation is biased: Empirical and theoretical support using a Bayesian estimator. *PLoS Comput Biol* **14**, e1006501 (2018).
21. Maresch, J., Werner, S. & Donchin, O. Methods matter: Your measures of explicit and implicit processes in visuomotor adaptation affect your results. *Eur J Neurosci* **53**, 504–518 (2021).
22. Vaswani, P. A. *et al.* Persistent Residual Errors in Motor Adaptation Tasks: Reversion to Baseline and Exploratory Escape. *J Neurosci* **35**, 6969–6977 (2015).
23. Leow, L.-A., Marinovic, W., de Rugy, A. & Carroll, T. J. Task errors contribute to implicit aftereffects in sensorimotor adaptation. *Eur J Neurosci* **48**, 3397–3409 (2018).
24. Morehead, J. R., Qasim, S. E., Crossley, M. J. & Ivry, R. Savings upon Re-Aiming in Visuomotor Adaptation. *J Neurosci* **35**, 14386–14396 (2015).
25. Haith, A. M., Huberdeau, D. M. & Krakauer, J. W. The Influence of Movement Preparation Time on the Expression of Visuomotor Learning and Savings. *J. Neurosci.* **35**, 5109–5117 (2015).

26. Campbell, R. sigstar. *GitHub* <https://github.com/raacampbell/sigstar>, (2023).
27. Fachada, N. & Rosa, A. micomp: A MATLAB/Octave toolbox for multivariate independent comparison of observations. *J Open Source Softw* **3**, (2018).
28. Albert, S. T. *et al.* Postural control of arm and fingers through integration of movement commands. *eLife* **9**, e52507 (2020).
